# Supplementary material for: Persistent DNA damage associated with ATM kinase deficiency promotes microglial dysfunction
Source: PubMed Central journal article supplement (PMC8934660; doi:10.1093/nar/gkac104), 2022-02-25
Supplement: gkac104_supplemental_file.pdf [file gkac104_supplemental_file.pdf]

**A**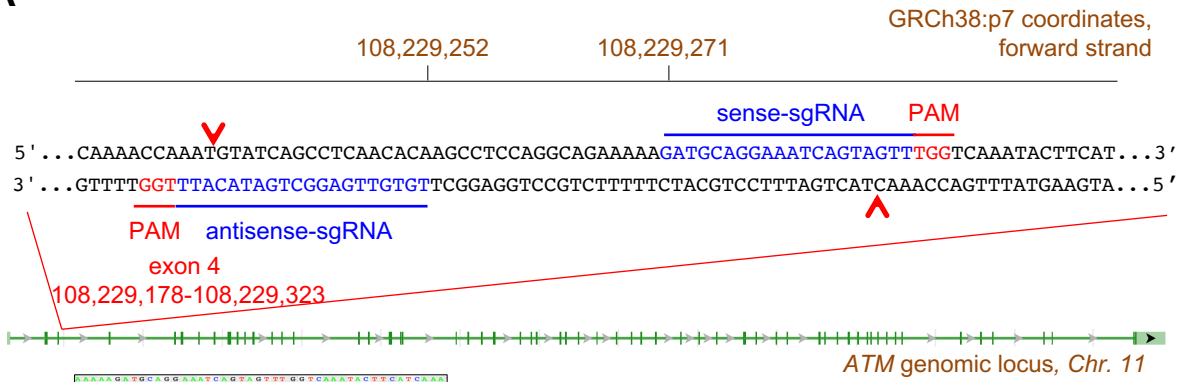

Genomic DNA:

sense-sgRNA      PAM

WT      AAAAAAGATGCAGGAAATCAGTAGTTGGTCA--AATACTTCATCAAA

ATM KO    AAAAAAGATGCCTCAACACAAGCCTCCAGGCAGATATACTTCATCAAA

Translation:

WT      KKMQEISLVKYFIKCANR...

ATM KO    KKMPQHKPPGRYTSSNVQTE...

ATM KO: frameshift mutation, predicted stop codon in exon 5, aa116

**B**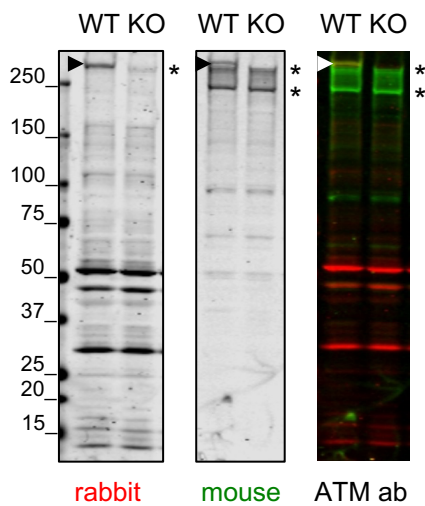**C**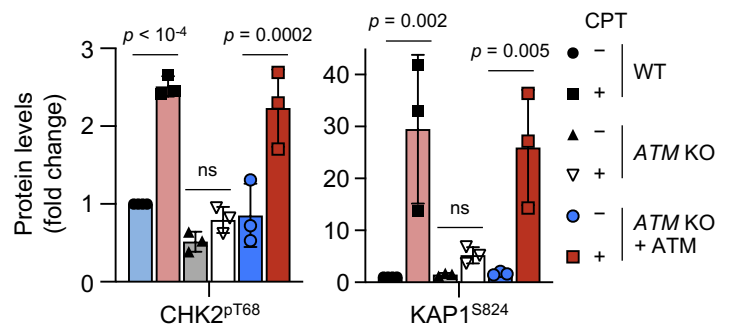**E****D**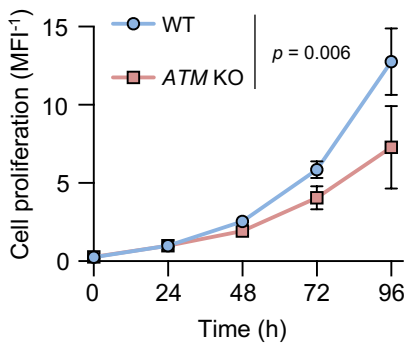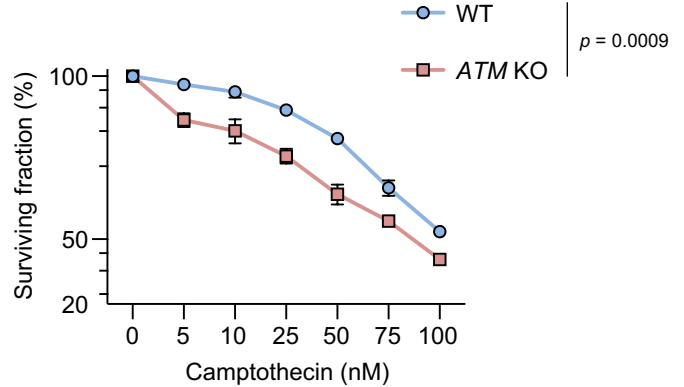

**Supplementary Figure S1: Generation and characterisation of *ATM* KO HMC3 microglia.**

**A** Design of CRISPR/Cas9-mediated targeting of the *ATM* locus (top). Sanger sequencing of *ATM* KO HMC3 showing 2 bp deletion in *ATM* exon 4 leading to a frame shift, premature STOP codon in exon 5 and generation of a truncated protein. WT HMC3 shown as control.

**B** Representative immunoblot analysis of ATM protein expression in *ATM* KO vs WT HMC3. Two different ATM antibodies raised against peptides corresponding to residues 1967-1988 (mouse monoclonal, green) and 2250-2600 (rabbit polyclonal, red) in human ATM were used.

\*Non-specific band.

**C** Quantification of phosphorylated protein levels as in **Figure 1A**. Data are relative to WT HMC3. Quantification is relative to total protein levels and the loading control. Mean  $\pm$  S.D. shown (n = 3). Two-way ANOVA with Sidak's multiple comparison's test used.

**D** Proliferation curves of WT and *ATM* KO HMC3 cells. Proliferation is relative to WT HMC3 at 24 h. Mean  $\pm$  S.D. shown (n = 3). Paired *t*-test of area under the curve used.

**E** Sensitivity of WT and *ATM* KO HMC3 cells to camptothecin. Mean  $\pm$  S.D. shown (n = 3 technical replicates). Paired *t*-test of area under the curve used.

**A**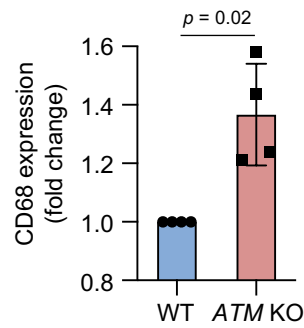**B**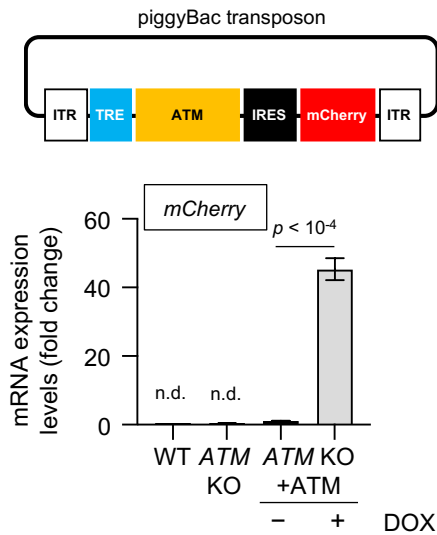

### Supplementary Figure S2: *ATM* knockout microglia are activated.

**A** Quantification of CD68 expression in WT and *ATM* KO HMC3 cells using immunofluorescence. Confocal Z-stack compression images were used for quantification. Mean  $\pm$  S.D. shown ( $n = 4$ ). One-sample *t*-test used.

**B** Schematic of piggyBac transposon carrying *ATM* gene (top) and quantitative RT-qPCR analysis of *mCherry* expression in cells as in **Figure 1A** (bottom). *ATM* KO cells, in which *ATM* was re-expressed from doxycycline-inducible piggyBac transgene, were cultured in the presence (0.1  $\mu\text{g}/\text{mL}$ ) or absence of doxycycline (DOX). Expression is relative to *ATM* KO HMC3, no DOX. Reference gene: *IPO8*. Mean  $\pm$  S.D. shown ( $n = 3$  technical replicates). One sample *t*-test used. N.d.: not detected.

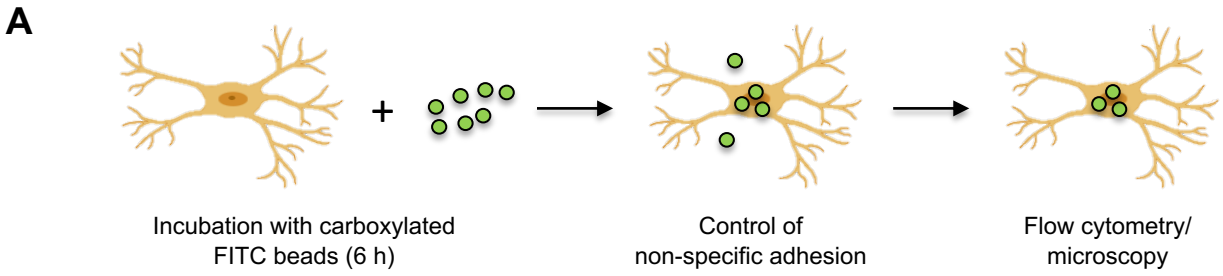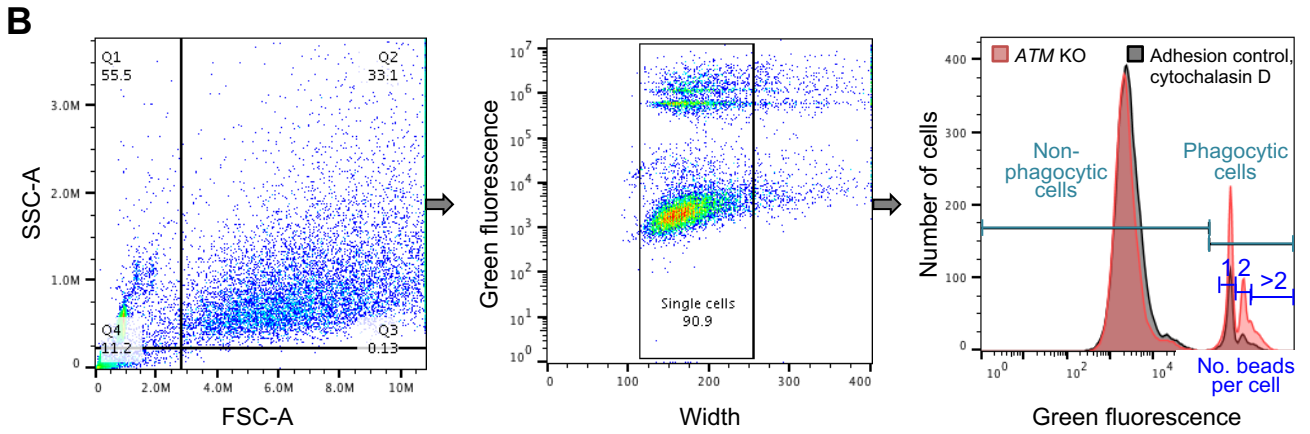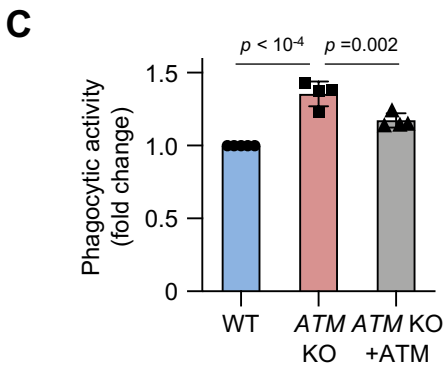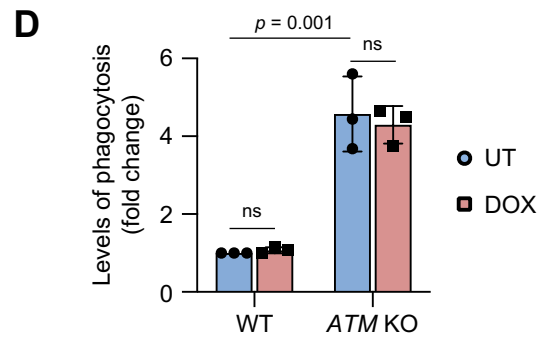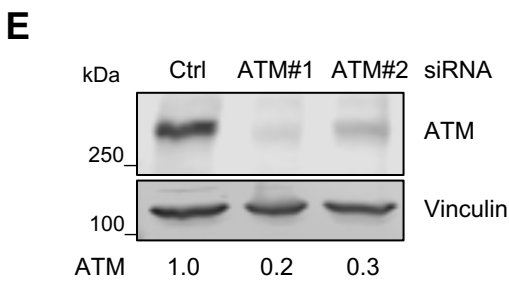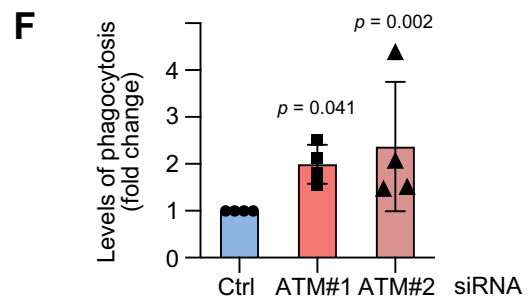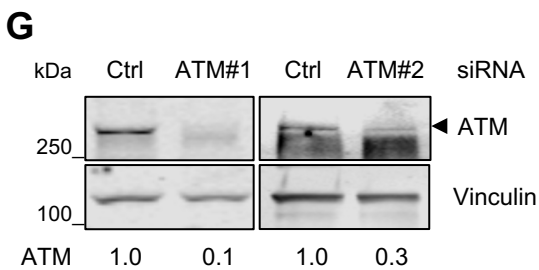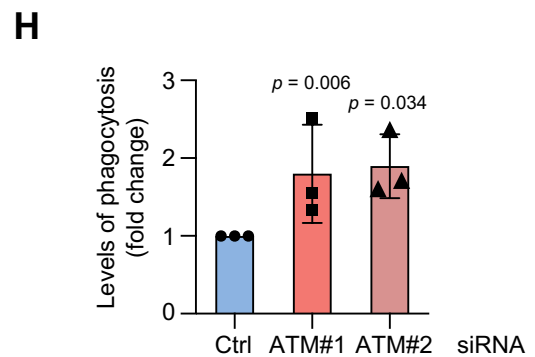

### **Supplementary Figure S3: ATM-deficient microglia are activated.**

**A** Schematic of phagocytosis assays.

**B** Workflow of phagocytosis analyses using 5  $\mu\text{m}$  beads as substrates by flow cytometry. To control for non-specific adhesion, phagocytosis assays were carried out in the absence or presence of 1  $\mu\text{M}$  cytochalasin D. Percentages of phagocytic cells further referred to as phagocytosis levels were determined. To calculate the relative average number of beads per cell (further referred to as phagocytic activity), mean fluorescent intensity (MFI) of phagocytic cells after subtracting MFI of the cytochalasin D control was divided by MFI of a single bead.

**C** Phagocytic (5  $\mu\text{m}$  beads) activity of HMC3 microglia as in **Figure 1G**. Activities are relative to WT HMC3. Mean  $\pm$  S.D. shown ( $n = 4$ ). One-way ANOVA with Tukey's multiple comparison's test used.

**D** Phagocytosis levels (5  $\mu\text{m}$  beads) of WT and ATM KO HMC3 cells cultured in the presence (0.1  $\mu\text{g}/\text{mL}$ ) or absence of DOX. Phagocytosis is relative to WT HMC3, in which  $5.6 \pm 1.7\%$  of cells are phagocytic. Mean  $\pm$  S.D. shown ( $n = 3$ ). Two-way ANOVA test used.

**E, G** Representative immunoblot analysis of ATM silencing using two independent siRNA sequences (ATM#1 and ATM#2) in HMC3 and C20 microglia, respectively. Loading control: vinculin. Quantification of ATM protein levels is relative to loading control.

**F, H** Phagocytosis levels (5  $\mu\text{m}$  beads) of ATM-deficient HMC3 and C20 as in (**E, G**), respectively. Phagocytosis is relative to cells treated with control siRNA (Ctrl), in which  $2.8 \pm 2.5\%$  (HMC3) or  $11.5 \pm 6.1\%$  (C20) of cells are phagocytic. Mean  $\pm$  S.D. shown ( $n = 4$  for HMC3,  $n = 3$  for C20). One-sample  $t$ -test used.

**A**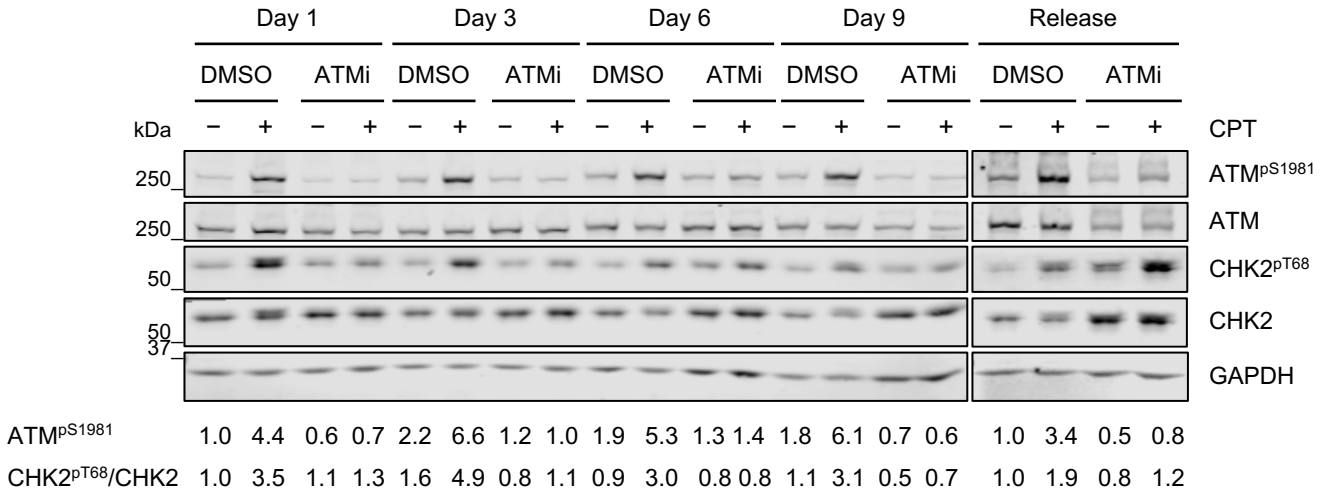**B**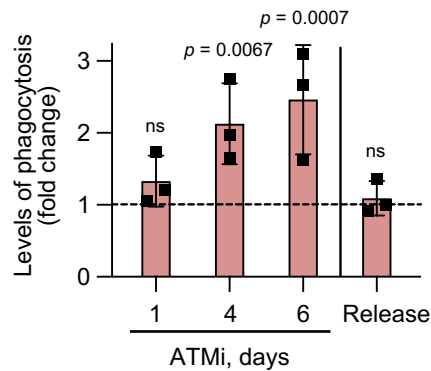

### Supplementary Figure S4: ATM inhibition leads to progressively increased phagocytosis.

**A** Representative immunoblot analysis of the efficacy of long-term inhibition of ATM activity and inhibitor wash out in HMC3 microglia. Cells were treated with DMSO as a control or 10 nM AZD1390 for up to 9 days. The inhibitor was washed out after 6 days of inhibition for an additional 2 days (Release). To test for ATM activity, cells were treated with 1  $\mu$ M camptothecin (CPT) and analysed at 1 h post-treatment. Quantification of phosphorylated protein levels is relative to total protein levels (except for ATM<sup>pS1981</sup>) and the loading control.

**B** Phagocytosis levels (5  $\mu$ m beads) of HMC3 cells treated with ATM inhibitor as in (A). Phagocytosis is relative to WT HMC3 at respective time points (dashed line). Mean  $\pm$  S.D. shown (n = 3). Two-way ANOVA with Tukey's multiple comparison's test used.

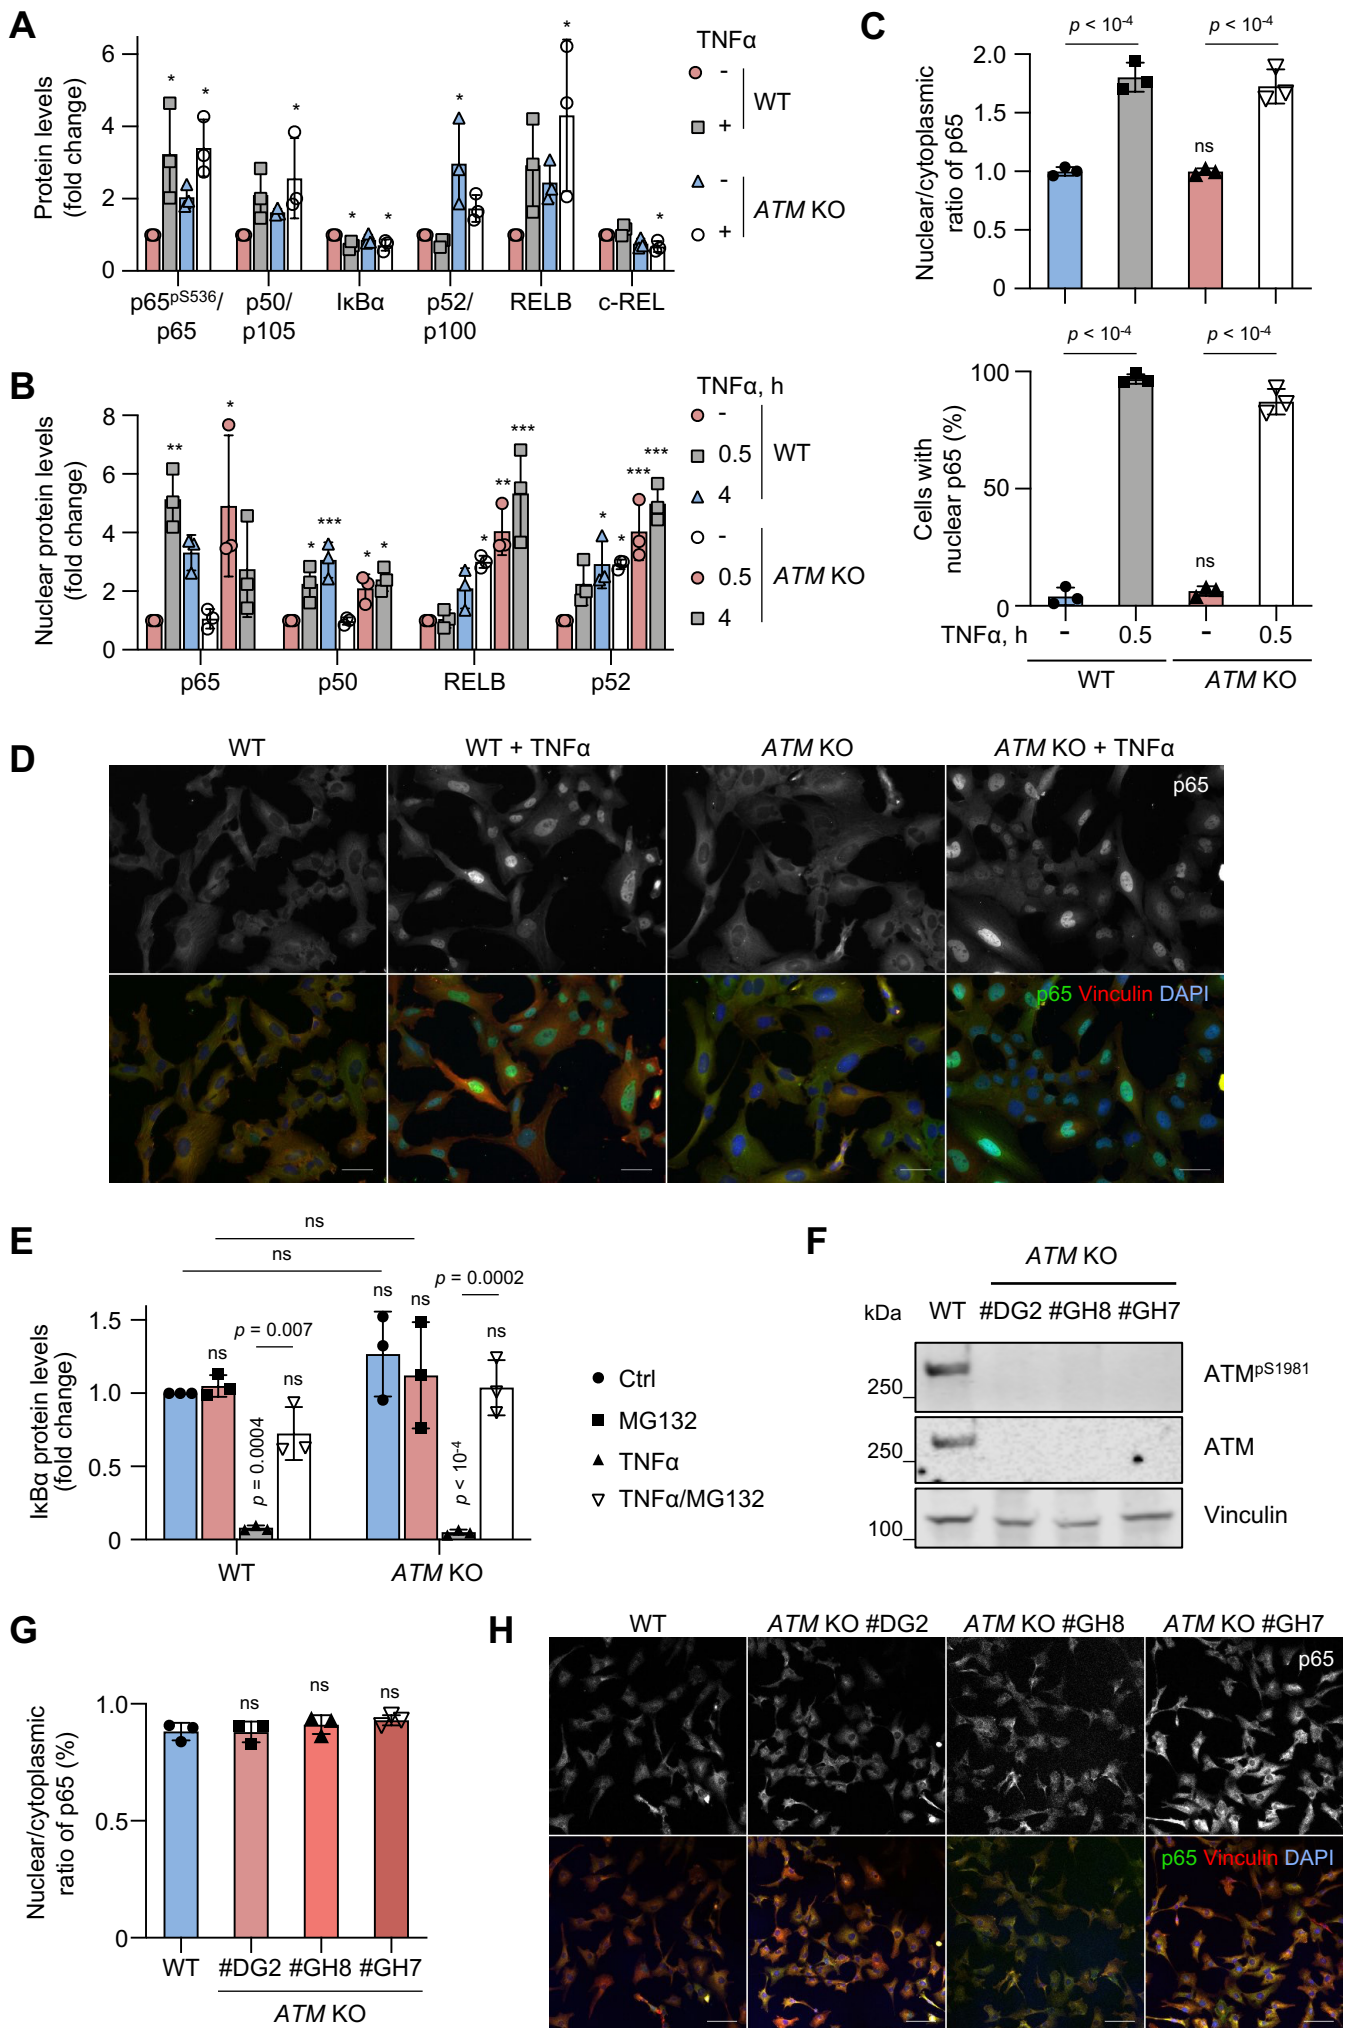

**Supplementary Figure S5: The canonical p65-dependent NF- $\kappa$ B pathway is not activated in *ATM* KO microglia under basal conditions.**

**A** Quantification of protein levels as in **Figure 2A**. Data are relative to WT HMC3 and loading control. Mean  $\pm$  S.D. shown (n = 3). Two-way ANOVA with Dunnett's multiple comparison's test used. *P*-values are shown relative to WT HMC3 (\**p* < 0.05).

**B** Quantification of nuclear protein levels as in **Figure 2B**. Data are relative to WT HMC3 and loading control. Mean  $\pm$  S.D. shown (n = 3). Two-way ANOVA with Sidak's multiple comparison's test used (\**p* < 0.05, \*\**p* < 0.005, \*\*\**p* < 0.0005).

**C** Quantification of p65 localisation presented as nuclear/cytoplasmic ratio (top) and percentage of cells with nuclear p65 (bottom) in WT and *ATM* KO HMC3 cells. Positive control: 10  $\mu$ M TNF- $\alpha$  for 30 min. Mean  $\pm$  S.D. shown (n = 3). Two-way ANOVA with Tukey's multiple comparison's test used.

**D** Representative images of **(C)**. Images in a single Z-plane shown. Scale bar: 50  $\mu$ m. p65 (green), vinculin (red), DNA (DAPI, blue).

**E** Quantification of I $\kappa$ B $\alpha$  protein levels as in **Figure 2C**. Data are relative to WT Ctrl. Mean  $\pm$  S.D. shown (n = 3). Two-way ANOVA with Sidak's multiple comparison's test used (*p*-values are shown relative to WT Ctrl unless specified).

**F** Representative immunoblot analysis of WT and three clones of *ATM* KO C20 microglia. Loading control: vinculin.

**G** Quantification of p65 localisation presented as nuclear/cytoplasmic ratio in WT and *ATM* KO C20 cells. Mean  $\pm$  S.D. shown (n = 3). One-way ANOVA with Dunnett's multiple comparison's test used.

**H** Representative images of **(G)**. Images of compressed z-stacks shown. Scale bar: 50  $\mu$ m. p65 (green), vinculin (red), DNA (DAPI, blue).



**A**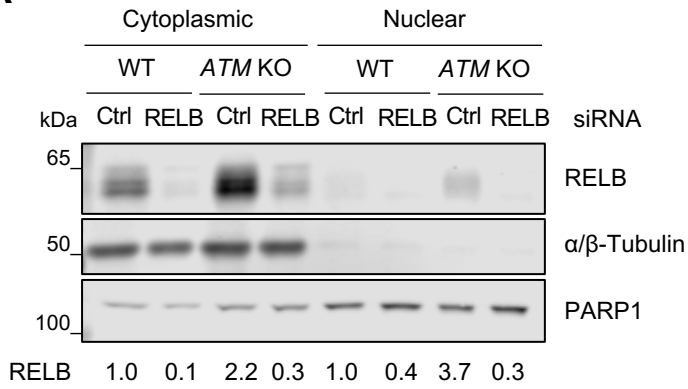**B**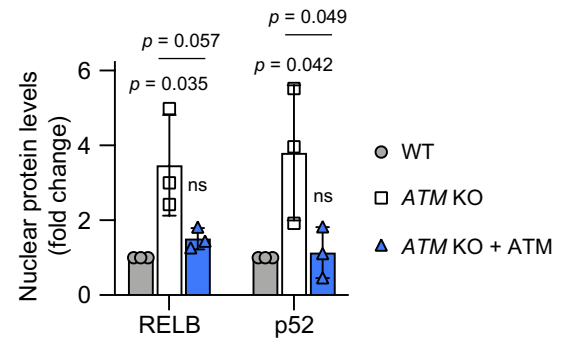**C**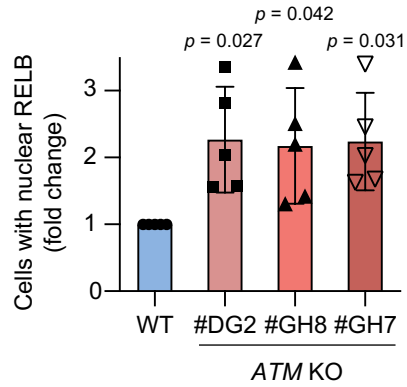**D**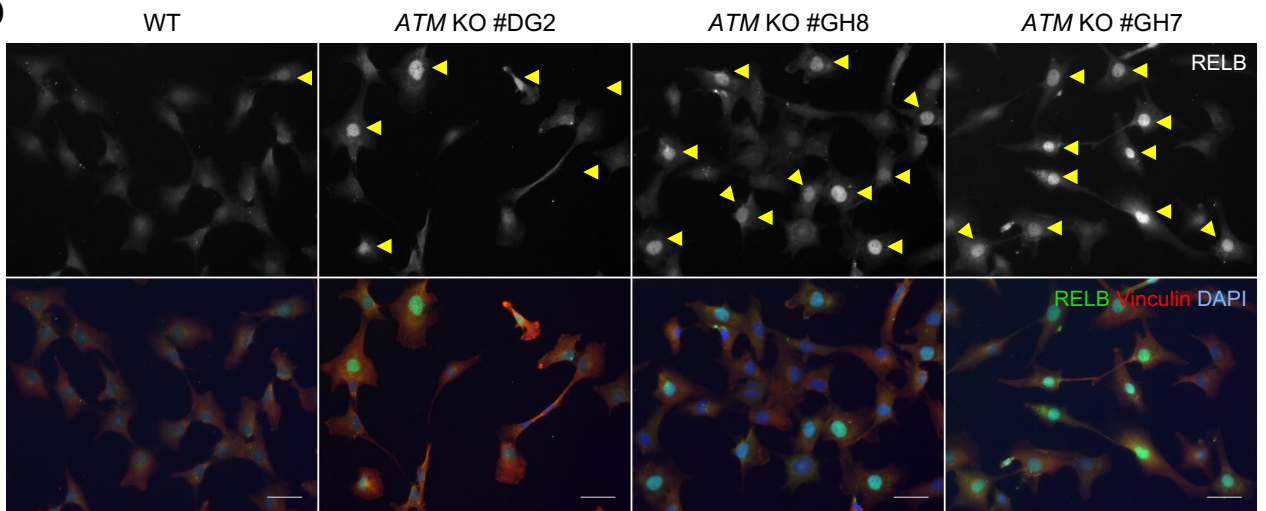**E**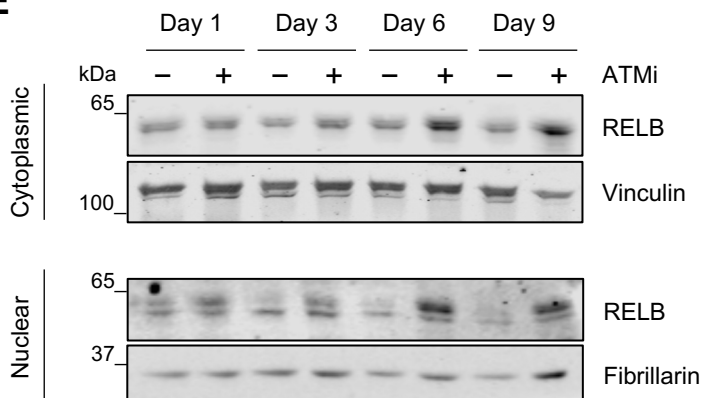**F**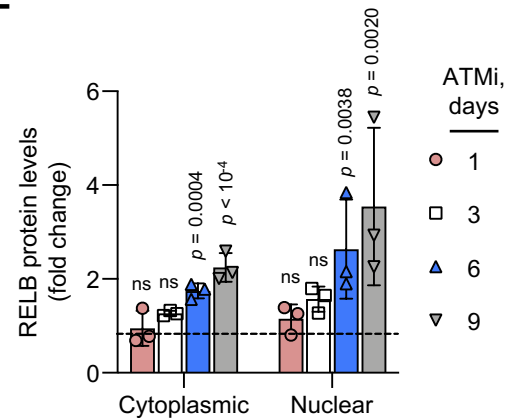

**Supplementary Figure S6: Non-canonical RELB/p52 NF- $\kappa$ B pathway is activated in *ATM* KO microglia.**

**A** Representative immunoblot analysis of siRNA-mediated silencing of RELB in cytoplasmic and nuclear extracts of WT and *ATM* KO HMC3 cells. Loading controls:  $\alpha/\beta$ -tubulin (cytoplasmic), PARP1 (nuclear). Quantification of RELB protein levels is relative to loading control in individual fractions.

**B** Quantification of nuclear protein levels as in **Figure 2F**. Data are relative to WT HMC3 and loading control. Mean  $\pm$  S.D. shown ( $n = 3$ ). One-way ANOVA with Tukey's multiple comparison's test used.

**C** Quantification of RELB localisation in WT and *ATM* KO C20 cells. Data are relative to WT C20, in which  $14.1 \pm 5.7\%$  of cells contain nuclear RELB. Mean  $\pm$  S.D. shown ( $n = 5$ ). One-way ANOVA with Dunnett's multiple comparison's test used.

**D** Representative images of **(C)**. Images in a single Z-plane shown. Scale bar: 50  $\mu$ m. RELB (green), vinculin (red), DNA (DAPI, blue).

**E** Representative immunoblot analysis of RELB in cytoplasmic (left) and nuclear (right) extracts of HMC3 cells treated with 10 nM AZD1390 or DMSO control as in **Supplementary Figure S4A**. Loading controls: vinculin (cytoplasmic), fibrillarin (nuclear).

**F** Quantification of protein levels as in **(E)**. Data are relative to DMSO control at respective time points (dashed line) and to loading control. Mean  $\pm$  S.D. shown ( $n = 3$ ). One-way ANOVA with Holm-Sidak's multiple comparison's test used.

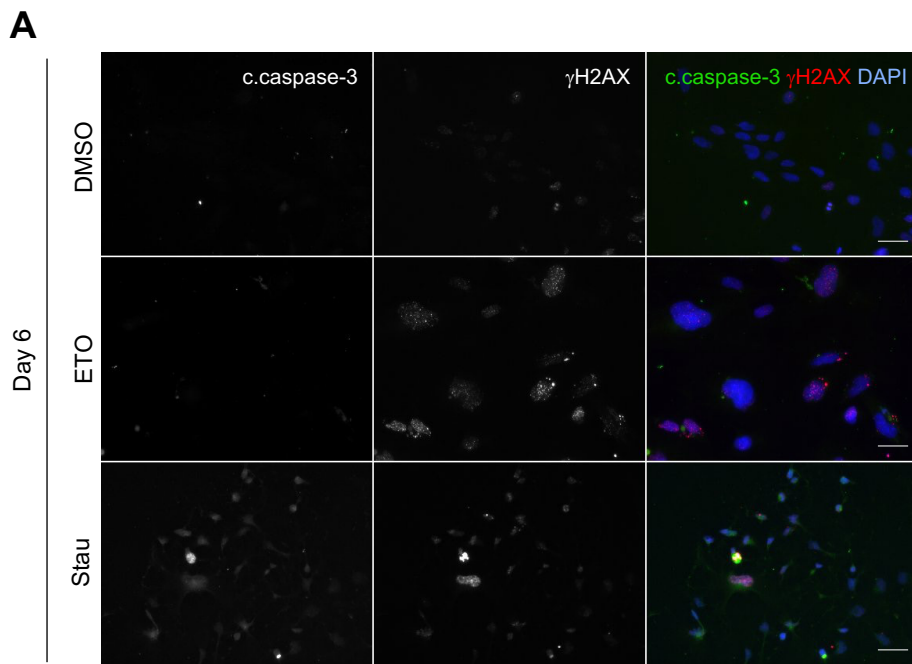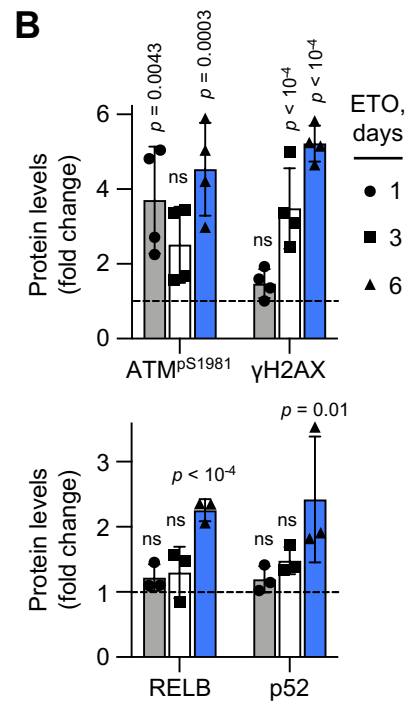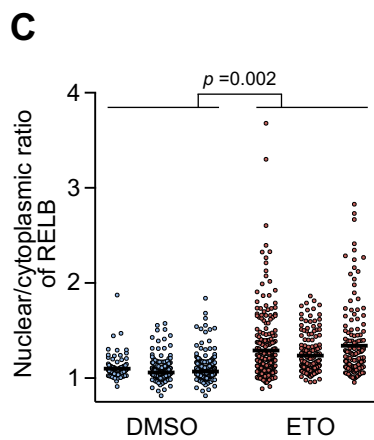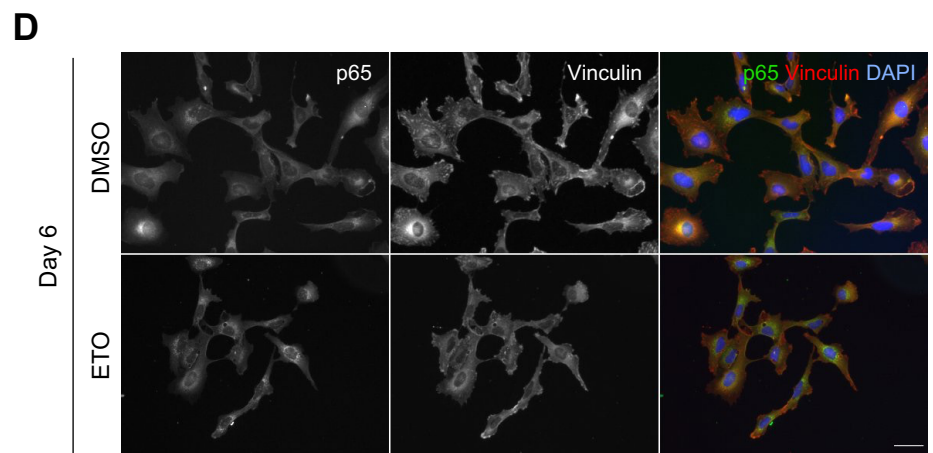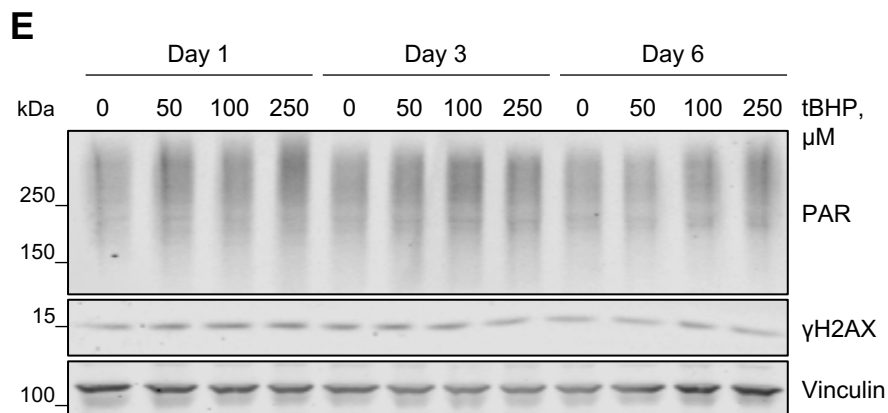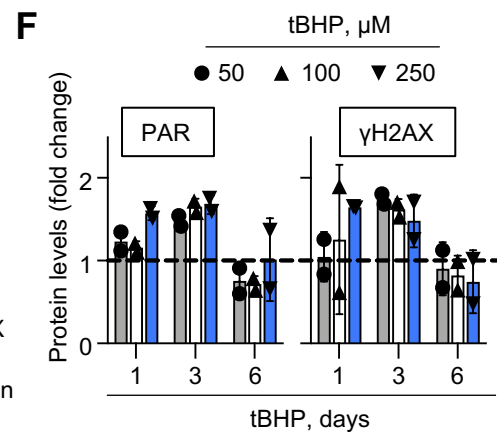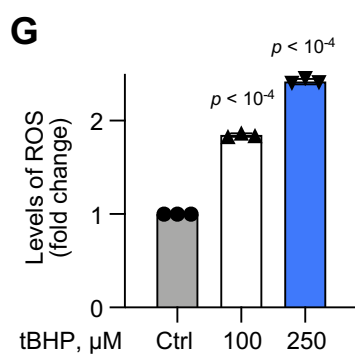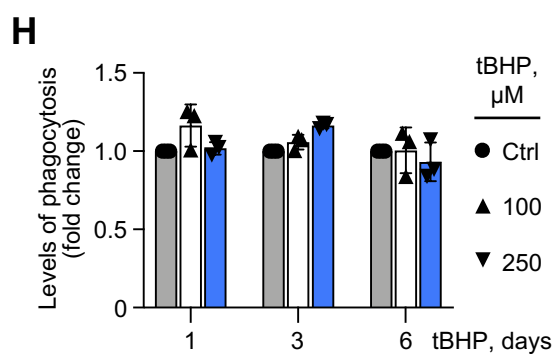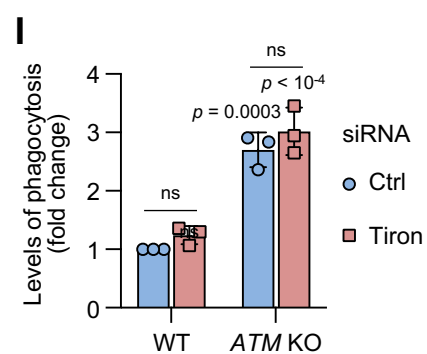

**Supplementary Figure S7: Persistent DNA damage leads to the activation of RELB/p52 NF- $\kappa$ B pathway.**

**A** Representative immunofluorescence images of HMC3 microglia treated with 0.5  $\mu$ M etoposide (ETO) or DMSO as a control for 6 days as in **Figure 5E**, and analysed for DNA damage and apoptosis/cell death. Positive control: 0.33  $\mu$ M staurosporine for 16 h (Stau). Images in a single Z-plane shown. Scale bar: 50  $\mu$ m. Cleaved caspase-3 (c.caspase-3; green),  $\gamma$ H2AX (red), DAPI (blue).

**B** Quantification of protein levels as in **Figure 5E**. Data are relative to DMSO control at respective time points (dashed line) and to loading control. Mean  $\pm$  S.D. shown ( $n = 4$  for ATM<sup>pS1981</sup> and  $\gamma$ H2AX,  $n = 3$  for RELB and p52). One-way ANOVA with Tukey's multiple comparison's test used.

**C** Quantification of RELB nuclear translocation in cells treated as in **Figure 5E**. Control: DMSO. Data presented as nuclear/cytoplasmic ratio of individual cells (100 cells per experiment;  $n = 3$ ). Nested  $t$ -test used.

**D** Representative immunofluorescence images of p65 localisation in cells treated as in **Figure 5E**. Images in a single Z-plane shown. Scale bar: 50  $\mu$ m. p65 (green), vinculin (red), DAPI (blue).

**E** Representative immunoblot analysis of DNA damage response markers in WT HMC3 microglia treated with 100-250  $\mu$ M tert-butyl hydroperoxide (tBHP) for up to 6 days. Loading control: vinculin.

**F** Quantification of protein levels as in **(E)**. Data are relative to control at respective time points (dashed line) and to loading control. Mean  $\pm$  S.D. shown ( $n = 2$ ).

**G** Levels of intracellular reactive oxygen species (ROS) in cells treated as in **(E)**. ROS levels are relative to WT HMC3. Mean  $\pm$  S.D. shown ( $n = 3$ ). One-way ANOVA with Dunnett's multiple comparisons used.

**H** Phagocytosis levels in WT HMC3 treated as in **(E)**. Phagocytosis is relative to Ctrl at respective time points. Mean  $\pm$  S.D. shown ( $n = 3$ ). No significant differences in any of the groups are detected using two-way ANOVA with Dunnett's multiple comparisons.

**I** Phagocytosis levels in WT and ATM KO HMC3 cells treated with 10  $\mu$ M Tiron for 72 h. Intracellular ROS in ATM KO microglia were reduced to (53  $\pm$  19)% compared to untreated Ctrl. Data are relative to WT HMC3. Mean  $\pm$  S.D. shown ( $n = 3$ ). Two-way ANOVA with Sidak's multiple comparisons used.

**A**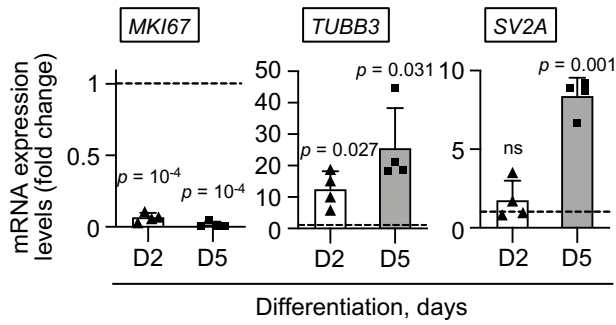**B**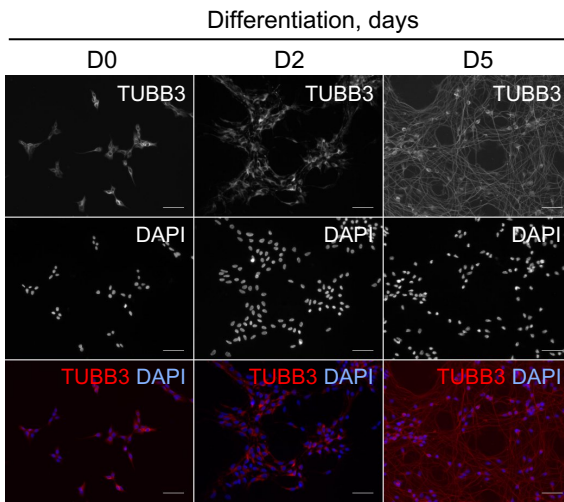**C**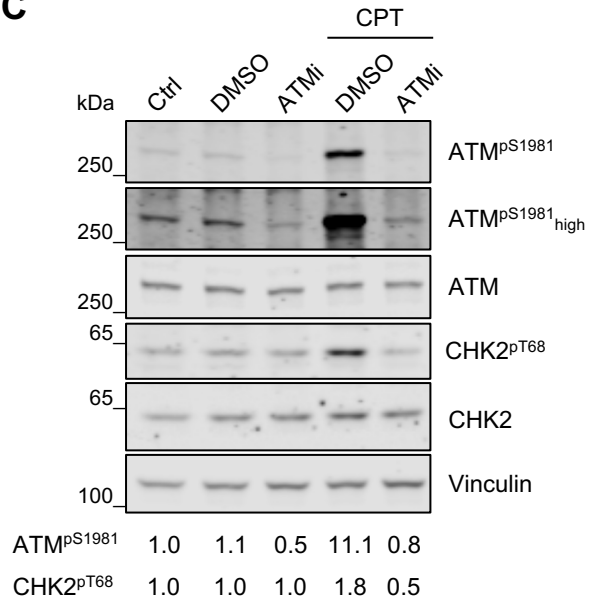**D**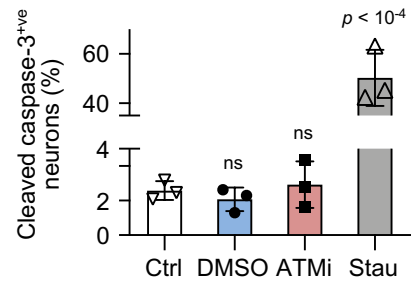**E**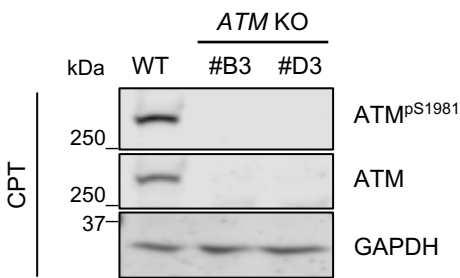**F**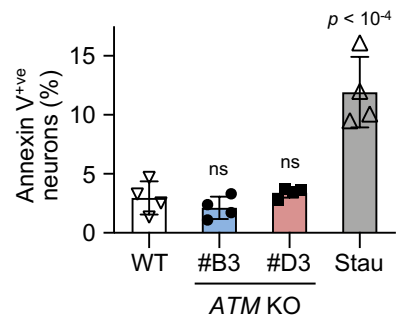**G**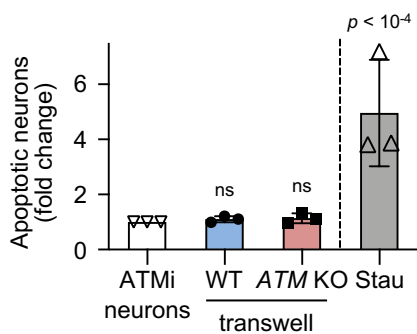**H**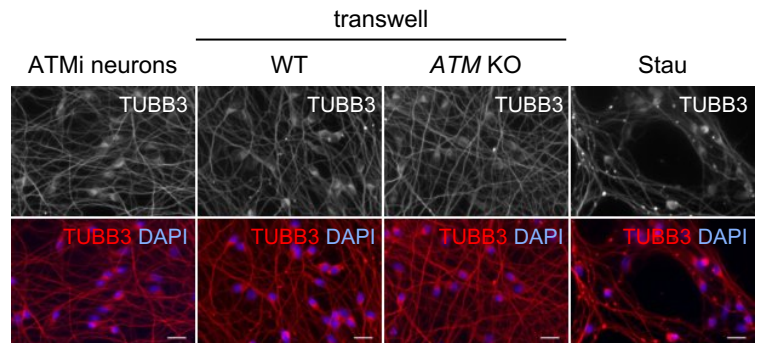

## Supplementary Figure S8: Generation and characterisation of ATM-deficient neuronal cell models.

**A** RT-qPCR analysis of proliferation MKI67, committed neuronal  $\beta$ 3-tubulin (TUBB3) and the synaptic marker SV2A in LUHMES cells at differentiation days 2 and 5 (D2, D5). Expression is relative to day 0 (dashed line). Reference gene: GAPDH. Mean  $\pm$  S.D. shown ( $n = 4$ ). Unpaired  $t$ -test used.

**B** Representative immunofluorescence images of cells in (A). Images in a single Z-plane shown. Scale bar: 50  $\mu$ m.  $\beta$ 3-tubulin (TUBB3; red), DAPI (blue).

**C** Representative immunoblot analysis showing the efficacy and the persistence of ATM activity inhibition in post-mitotic LUHMES neurons. From day 2, cells were differentiated in the presence of 100 nM AZD1390 or DMSO for 3 days. Untreated post-mitotic neurons were used as a control (Ctrl). After 3 days of inhibition, AZD1390 was washed out and cells were cultured in standard differentiation medium for an additional 48 h. To test for ATM activity, cells were treated with 1  $\mu$ M camptothecin (CPT) and analysed at 1 h post treatment. Quantification of phosphorylated protein levels is relative to total protein levels (except for ATM<sup>pS1981</sup>) and the loading control.

**D** Quantification of cleaved caspase-3 positive LUHMES neurons in post-mitotic LUHMES neurons treated with AZD1390 or DMSO for 3 days during differentiation. Ctrl: standard differentiation medium. Positive control: 0.33  $\mu$ M staurosporine for 16 h (Stau). Data are relative to Ctrl. Mean  $\pm$  S.D. shown ( $n = 3$  for Ctrl). One-way ANOVA with Dunnett's multiple comparison's test used.

**E** Representative immunoblot analysis of WT and two clonal ATM KO LUHMES cell lines treated with 1  $\mu$ M camptothecin (CPT) for 1 h. Loading control: GAPDH.

**F** Quantification of early apoptotic (Annexin V<sup>+ve</sup>) post-mitotic WT and ATM KO LUHMES neurons. Positive control: 1  $\mu$ M staurosporine for 6 h (Stau). Percentages of late apoptotic (Annexin V<sup>+ve</sup>/propidium iodide<sup>+ve</sup>) and necrotic (propidium iodide<sup>+ve</sup>) cells were below 1% and similar in all samples. Mean  $\pm$  S.D. shown ( $n = 4$ ). One-way ANOVA with Dunnett's multiple comparison's test used.

**G** Immunofluorescence-based quantification of apoptotic (pyknotic and fragmented nuclei) post-mitotic ATM-deficient LUHMES neurons treated as in (C) and cultured in a transwell insert in the absence (Ctrl) or presence of WT or ATM KO HMC3 microglia for 48 h. Positive control: 0.33  $\mu$ M staurosporine for 16 h (Stau). Data are relative to Ctrl, in which  $9.1 \pm 4.2\%$  of cells are apoptotic. Mean  $\pm$  S.D. shown ( $n = 3$ , two Stau data points are from separate experiments). One-way ANOVA with Dunnett's multiple comparison's test used.

**H** Representative immunofluorescence images of LUHMES cells in (E). Images in a single Z-plane shown. Scale bar: 20  $\mu$ m.  $\beta$ 3-tubulin (TUBB3; red), DAPI (blue).

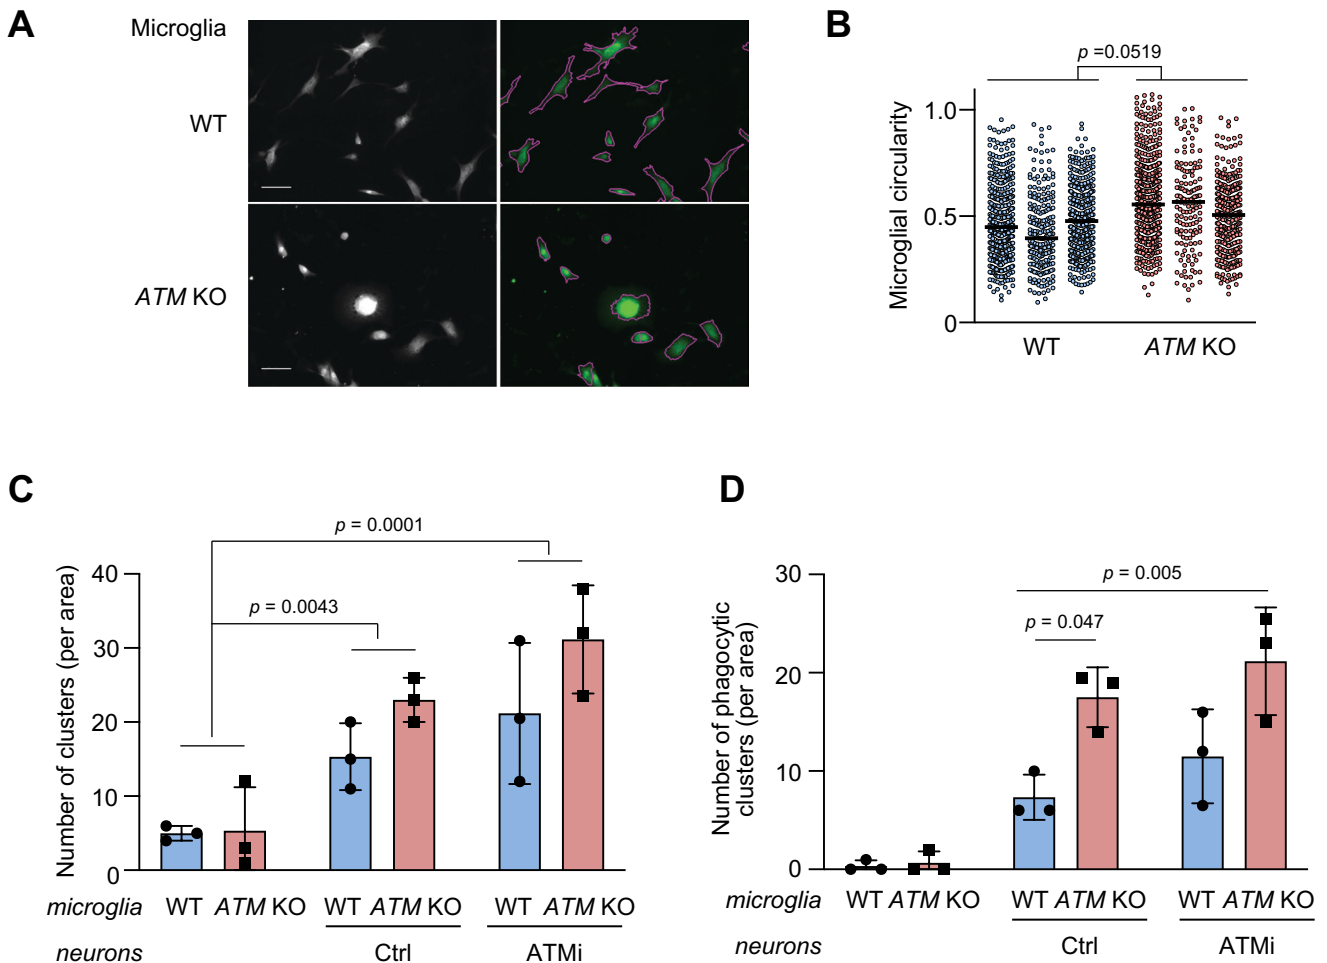

### Supplementary Figure S9: ATM knockout neurons aberrantly engulf neurites.

**A** Representative images of WT and ATM KO HMC3 microglia co-cultured with ATM KO (clone #D3) post-mitotic LUHMES neurons for 24 h. CFSE-stained microglia in non-clustered areas with segmentation of cells using CellProfiler are shown. Images are in a single Z-plane. Scale bar: 50  $\mu\text{m}$ .

**B** Quantification of morphological changes in microglia as in (A). Data presented as circularity of individual cells ( $n = 3$ ; minimum 150 cells per experiment). Nested  $t$ -test used.

**C** Quantification of clusters formed by WT or ATM KO HMC3 microglia on their own or in co-culture with post-mitotic ATM-inhibited LUHMES neurons that were pretreated with AZD1390 or left untreated (Ctrl) as in **Figure 6G**. Mean  $\pm$  S.D. shown ( $n = 3$ ). Two-way ANOVA with Sidak's multiple comparison's test used.

**D** Quantification of phagocytic microglial clusters from (C). Mean  $\pm$  S.D. shown ( $n = 3$ ). Two-way ANOVA with Tukey's multiple comparison's test used.

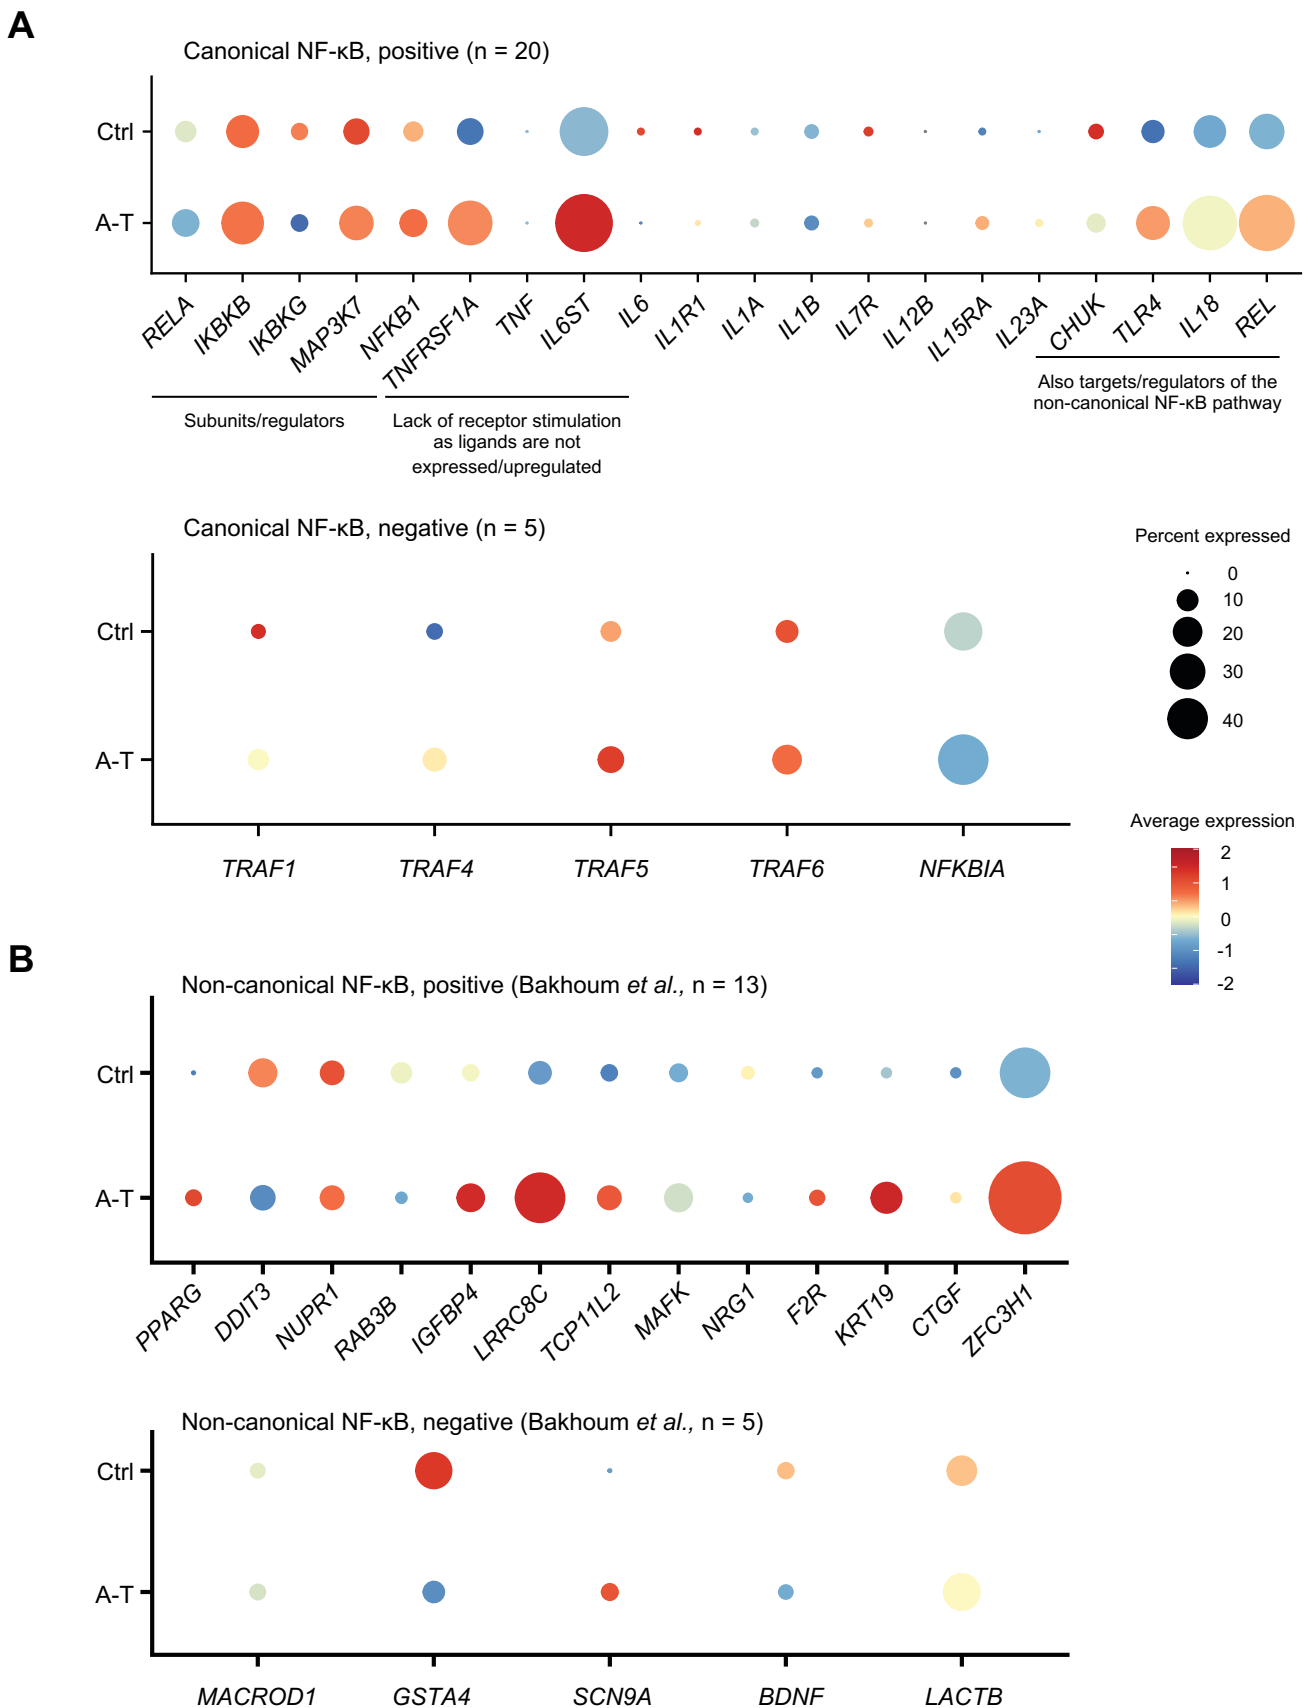

**Supplementary Figure S10: Canonical NF- $\kappa$ B is not activated in cerebellar microglia of individuals with A-T.**

**A, B** Dotplot of the average expression and percent cells expressed for individual genes involved in activation (positive) and inhibition (negative) of the **(A)** canonical and **(B)** non-canonical NF- $\kappa$ B pathway in A-T vs Ctrl cerebellar microglia. Average expression is represented by the z-score calculated by centering and scaling across microglia from A-T and Ctrl in cerebellum and prefrontal cortex.



**Supplementary Table S1.** Reagents and tools used in the study.

| Reagent/Resource                                             | Reference or Source                                                                            | Identifier or Catalogue Number |
|--------------------------------------------------------------|------------------------------------------------------------------------------------------------|--------------------------------|
| <b>Experimental Models: Cell lines</b>                       |                                                                                                |                                |
| Human microglial HMC3 cells                                  | Established by Marc Tardieu and kindly provided by Brian Bigger (University of Manchester, UK) | (1)                            |
| <i>ATM</i> knockout HMC3 cells                               | This study                                                                                     |                                |
| <i>ATM</i> knockout HMC3 cells expressing pPB-TRE Flag-wtATM | This study                                                                                     |                                |
| Human microglial C20 cells                                   | Kind gift of David Alvarez-Carbonell                                                           | (2)                            |
| <i>ATM</i> knockout C20 cells (clones G:H7, G:H8, D:G2)      | This study                                                                                     |                                |
| Human mesencephalic LUHMES cells                             | ATCC                                                                                           | CRL2927                        |
| <i>ATM</i> knockout LUHMES cells (clones B3, D3)             | This study                                                                                     |                                |
| <b>Bacterial Strains</b>                                     |                                                                                                |                                |
| DH5 $\alpha$                                                 | Invitrogen                                                                                     | 18265017                       |
| NEB <sup>®</sup> 10-beta                                     | New England Biolabs                                                                            | C3019                          |
| <b>Recombinant DNA</b>                                       |                                                                                                |                                |
| pSpCas9n(BB)-2A-Puro (PX462)                                 | Addgene                                                                                        | 48141 (3)                      |
| AIO-GFP                                                      | Addgene                                                                                        | 74119 (4)                      |
| pSpCas9(BB)-2A-Puro V2.0                                     | Addgene                                                                                        | 62988 (3)                      |
| pcDNA3.1 Flag-His-ATM plasmid                                | Addgene                                                                                        | 31985 (5)                      |
| rtTA                                                         | kind gift of Bon-Kyoung Koo                                                                    | (6)                            |
| pPB-transposase                                              | kind gift of Bon-Kyoung Koo                                                                    | (6)                            |
| pPB-TRE IRES-mCherry                                         | kind gift of Bon-Kyoung Koo                                                                    | (6)                            |
| pPB-TRE Flag-wtATM                                           | This paper                                                                                     |                                |
| <b>Oligonucleotides</b>                                      |                                                                                                |                                |
| <b>Cloning</b>                                               |                                                                                                |                                |
| ATM fragment 1 Forward:                                      | tcattttggcaaagaattccTAATGGACTACAAGGACG                                                         |                                |
| ATM fragment 1 Reverse:                                      | aaaggagaaGCTACGTAATGACACATC                                                                    |                                |
| ATM fragment 2 Forward:                                      | attacgtagcTTCTCCCTTTGTTGTGAC                                                                   |                                |
| ATM fragment 2 Reverse:                                      | cgatatcaagcttatcgagcGATCACACCCAAGCTTTC                                                         |                                |
| <b>Fragment analysis</b>                                     |                                                                                                |                                |

|                   |                               |
|-------------------|-------------------------------|
| ATM-exon4 Forward | GCTCTTTGTGATGGCATGAACAGCTTTTG |
| ATM-exon4 Forward | CTCACGCGACAGTAATCTGTTAAGCCAT  |

### RT-qPCR

|                 |                           |
|-----------------|---------------------------|
| mCherry Forward | CACGAGTTCGAGATCGAGGG      |
| mCherry Reverse | CAAGTAGTCGGGATGTCTG       |
| IL6 Forward     | AGACAGCCACTCACCTCTTCAG    |
| IL6 Reverse     | TTCTGCCAGTGCCTCTTTGCTG    |
| IL8 Forward     | ATGACTTCCAAGCTGGCCGTGGCT  |
| IL8 Reverse     | TCTCAGCCCTCTTCAAAAATTCTC  |
| IL1B Forward    | CCACAGACCTTCAGGAGAATG     |
| IL1B Reverse    | GTGCAGTTCAGTGATCGTACAGG   |
| TNFA Forward    | CAGCCTCTTCTCCTTCCTGAT     |
| TNFA Reverse    | GCCAGAGGGCTGATTAGAGA      |
| IL4 Forward     | ACCATGAGAAGGACACTCGC      |
| IL4 Reverse     | CTCTGGTTGGCTTCCTTACA      |
| CCL5 Forward    | GCTGTCATCCTCATTGCTACTG    |
| CCL5 Reverse    | TGGTGTAGAAATACTCCTTGATGTG |
| MAP3K14 Forward | ACAACGAGGGTGCCTGCTC       |
| MAP3K14 Reverse | TCAGCTCCTCTGCCCGAAA       |
| MKI67 Forward   | TGGGCGAAGTTCACAGTCAA      |
| MKI67 Reverse   | TGAGCACTCTGTAGGGTCGA      |
| TUBB3 Forward   | CGCCCAGTATGAGGGAGAT       |
| TUBB3 Reverse   | AGTCGCCACGTAGTTGC         |
| SV2A Forward    | AGATCGGCAGGCTCAGAAT       |
| SV2A Reverse    | GACAGGAAGAAGCAGGAGACA     |
| RPS13 Forward   | CGAAAGCATCTTGAGAGGAACA    |
| RPS13 Reverse   | TCGAGCCAAACGGTGAATC       |
| IPO8 Forward    | GGCACCCTCAGCGAGGAT        |
| IPO8 Reverse    | TGTTGTTCAATCTTCTTTGCCT    |

### siRNA Oligonucleotides

|                           |                            |                                  |
|---------------------------|----------------------------|----------------------------------|
| siCtrl (negative control) | Eurogentec                 | SR-CL000-005                     |
| siATM#1                   | GGGCCUUUGUUCUUCGAGACGUUUAU | kind gift of<br>Ester<br>Hammond |
| siATM#2                   | GAGAGGAGACAGCUUGUUAUU      | (7)                              |
| siRELB                    | CACAGAUGAAUUGGAGAUCAU      | (8)                              |

|                         |                           |     |
|-------------------------|---------------------------|-----|
| si <sup>pan</sup> NF-κB | AAGGUGCAGAAAGAGGACA       | (9) |
| siNIK                   | CCTGUGUAGACAGCCAGAAACCCUU |     |

---

### Antibodies

---

|                                      |                             |             |
|--------------------------------------|-----------------------------|-------------|
| β-Actin (WB)                         | Abcam                       | ab6276      |
| Fibrillarin (WB)                     | Abcam                       | ab4566      |
| GAPDH (WB)                           | Cell Signaling              | 2118        |
| Lamin A/C                            | Cell Signaling              | 2032        |
| α/β-Tubulin (WB)                     | Cell Signaling              | 2148        |
| Vinculin (WB, IF)                    | Abcam                       | ab18058     |
| ATM (WB)                             | Abcam                       | ab78        |
| ATM (WB, IF)                         | Bethyl Laboratories         | A300-299A   |
| ATM phosphoSer1981 (WB, IF)          | Abcam                       | ab81292     |
| Caspase-3 (WB)                       | Santa Cruz                  | sc-7272     |
| Cleaved caspase-3 (WB, IF)           | Cell Signaling              | 9664        |
| CD40 (Flow cytometry)                | GeneTex                     | GTX14148    |
| CD68 (IF)                            | Santa Cruz                  | sc-20060    |
| KAP1 (WB)                            | Abcam                       | ab22553     |
| KAP1 phosphoS824 (WB)                | Abcam                       | ab70369     |
| CHK2 (WB)                            | Cell Signaling              | 3440        |
| CHK2 phosphoThr68 (WB)               | Cell Signaling              | 2661        |
| γH2A.X (WB, IF)                      | Millipore                   | 05-636      |
| IκBα (WB)                            | Cell Signalling             | 4814        |
| NIK (WB)                             | Cell Signaling              | 4994        |
| PAR (WB)                             | Trevigen                    | 4335-MC-100 |
| PARP-1 (WB)                          | kind gift of Grigory Dianov | (10)        |
| β3-tubulin                           | Santa Cruz                  | sc-80005    |
| RELA (p65; WB, IF)                   | Cell Signaling              | 8242        |
| RELA phosphoS536 (WB)                | Cell Signaling              | 3033S       |
| RELB (IF)                            | Abcam                       | ab180127    |
| RELB (WB)                            | Cell Signaling              | 4922        |
| c-REL (WB)                           | Cell Signaling              | 12707       |
| p50/p105 (WB)                        | Cell Signaling              | 13586       |
| p52/p100 (WB)                        | Cell Signaling              | 4882        |
| AlexaFluor 680 goat anti-rabbit (WB) | Molecular Probes            | A27042      |
| IR Dye 800 goat anti-mouse (WB)      | LI-COR Biosciences          | 926-32210   |

|                                                     |            |          |
|-----------------------------------------------------|------------|----------|
| AlexaFluor 488 goat anti-mouse (IF, Flow cytometry) | Invitrogen | A11001   |
| AlexaFluor 488 goat anti-rabbit (IF)                | Invitrogen | A32731   |
| AlexaFluor 594 goat anti-mouse (IF)                 | Invitrogen | A-11032  |
| Alexa Fluor 594 goat anti-rabbit (IF)               | Abcam      | ab150080 |

---

### Chemicals, enzymes and other reagents

---

|                                                  |                      |            |
|--------------------------------------------------|----------------------|------------|
| ATM inhibitor AZD1390                            | Selleckchem          | S8680      |
| Camptothecin                                     | Cambridge Bioscience | CAY11694   |
| Etoposide                                        | Cambridge Bioscience | CAY12092   |
| Recombinant TNF $\alpha$                         | Preprotech           | 300-01A    |
| tert-Butyl hydroperoxide                         | Merck                | 168521     |
| 4,5-dihydroxy-1,3-benzenedisulfonic acid (Tiron) | Merck                | 172553     |
| Carboxyfluorescein succinimidyl ester (CFSE)     | Tonbo Biosciences    | 13-0850    |
| CM-H2DCF-DA                                      | ThermoFisher         | C6827      |
| Puromycin                                        | Santa Cruz           | sc-108071  |
| Hygromycin B                                     | Millipore            | 400051     |
| Doxycycline                                      | Merck                | D9891      |
| Phusion High-Fidelity DNA Polymerase             | ThermoFisher         | F530       |
| Lipofectamine2000                                | Invitrogen           | 11668019   |
| Lipofectamine RNAiMax                            | Invitrogen           | 13778-150  |
| Polyethylenimine (PEI)                           | Polysciences Inc.    | 23966      |
| DNase I                                          | ThermoFisher         | EN0521     |
| Carboxyl Fluorescent Particles, 5.0-5.9 $\mu$ m  | Spherotech           | CFH-5052-2 |
| SYBR Gold                                        | Molecular Probes     | S11494     |

---

### Kits and assays

---

|                                                      |                     |            |
|------------------------------------------------------|---------------------|------------|
| RNeasy Mini Kit                                      | QIAGEN              | 74106      |
| qPCRBIO cDNA Synthesis Kit                           | PCR Biosystems      | PB30.11-10 |
| qPCRBIO SyGreen Blue Mix Lo-ROX                      | PCR Biosystems      | PB20.15-20 |
| NEBuilder <sup>®</sup> HiFi DNA Assembly Cloning Kit | New England Biolabs | E5520      |
| Glial-Mag Magnetofection                             | OzBiosciences       | GL00500    |

|                                                |              |        |
|------------------------------------------------|--------------|--------|
| CellTrace™ Violet Cell Proliferation Kit (CTV) | ThermoFisher | C34557 |
| CellTiter-Glo® 2.0                             | Promega      | G9243  |

---

### **Software and Algorithms**

---

|                                       |                   |
|---------------------------------------|-------------------|
| QuantStudio™ Design & Analysis v1.5.1 | ThermoFisher      |
| Image Studio™ Lite Software           | Licor             |
| Image J                               | NIH               |
| FlowJo 10.4.2                         | FlowJo            |
| GraphPad Prism                        | GraphPad Software |

---

---

**Supplementary Table S2.** NF- $\kappa$ B gene set lists.

| Non-canonical NF- $\kappa$ B pathway members |                 | Non-canonical NF- $\kappa$ B pathway targets (11) |                 | Canonical NF- $\kappa$ B pathway |                 |
|----------------------------------------------|-----------------|---------------------------------------------------|-----------------|----------------------------------|-----------------|
| Negative (n=5)                               | Positive (n=11) | Negative (n=5)                                    | Positive (n=13) | Negative (n=5)                   | Positive (n=20) |
| TRAF2                                        | LTBR            | MACROD1                                           | PPARG           | TRAF1                            | TNFRSF1A        |
| TRAF3                                        | CD40            | GSTA4                                             | DDIT3           | TRAF4                            | IL1R1           |
| BIRC2                                        | TNFRSF8         | SCN9A                                             | NUPR1           | TRAF5                            | TLR4            |
| BIRC3                                        | CD27            | BDNF                                              | RAB3B           | TRAF6                            | RELA            |
| TRIM9                                        | TNFRSF13C       | LACTB                                             | IGFBP4          | NFKBIA                           | REL             |
| FBXW7                                        | TNFRSF1B        |                                                   | LRRC8C          |                                  | NFKB1           |
|                                              | TNFRSF11A       |                                                   | TCP11L2         |                                  | CHUK            |
|                                              | RELB            |                                                   | MAFK            |                                  | IKKBK           |
|                                              | NFKB2           |                                                   | NRG1            |                                  | IKBKG           |
|                                              | MAP3K14         |                                                   | F2R             |                                  | MAP3K7          |
|                                              |                 |                                                   | KRT19           |                                  | TNF             |
|                                              |                 |                                                   | CTGF            |                                  | IL12B           |
|                                              |                 |                                                   | ZFC3H1          |                                  | IL15RA          |
|                                              |                 |                                                   |                 |                                  | IL18            |
|                                              |                 |                                                   |                 |                                  | IL1A            |
|                                              |                 |                                                   |                 |                                  | IL1B            |
|                                              |                 |                                                   |                 |                                  | IL23A           |
|                                              |                 |                                                   |                 |                                  | IL6             |
|                                              |                 |                                                   |                 |                                  | IL6ST           |
|                                              |                 |                                                   |                 |                                  | IL7R            |

Negative regulators/supressed genes are shown in red. n - number of genes in a gene set.

**Supplementary Table S3.** *T*-score permutation test results with *p*-values for A-T vs control (Ctrl) cerebellum as in **Figure 7A**.

| Gene set                                           | Observed average <i>t</i> -score | Permuted average <i>t</i> -score | <i>p</i> -value | Bonferroni adjusted <i>p</i> -value |
|----------------------------------------------------|----------------------------------|----------------------------------|-----------------|-------------------------------------|
| Canonical NF- $\kappa$ B, positive (n=20)          | 1.270                            | 0.217                            | 0.117           | 0.700                               |
| Canonical NF- $\kappa$ B, negative (n=5)           | 2.954                            | 0.233                            | 0.054           | 0.323                               |
| Non-canonical NF- $\kappa$ B, positive (n=10)      | 3.532                            | 0.210                            | 0.005           | 0.027                               |
| Non-canonical NF- $\kappa$ B, negative (n=6)       | -1.560                           | 0.212                            | 0.862           | 1.000                               |
| Non-canonical NF- $\kappa$ B, positive (11) (n=13) | 1.948                            | 0.232                            | 0.053           | 0.316                               |
| Non-canonical NF- $\kappa$ B, negative (11) (n=5)  | -2.256                           | 0.242                            | 0.914           | 1.000                               |

Pathways, enrichment of which is significantly different between A-T vs control cerebellar microglia (FDR < 0.05), are highlighted in green. FDR – false discovery rate.

**Supplementary Table S4.** logFC and *t*-scores for individual genes in A-T vs Ctrl cerebellum as in **Figure 7B** and **Supplementary Figure S10**.

| Gene set                                                 | Gene     | Log FC | Log CPM | F-statistic | <i>p</i> -value | FDR      | <i>t</i> -score |
|----------------------------------------------------------|----------|--------|---------|-------------|-----------------|----------|-----------------|
| Canonical NF- $\kappa$ B,<br>negative (n=5)              | TRAF1    | 0.125  | 10.889  | 12.734      | 0.178           | 0.696    | 3.568           |
|                                                          | TRAF4    | 0.314  | 10.897  | 5.403       | 0.321           | 0.992    | 2.324           |
|                                                          | TRAF5    | 0.149  | 10.900  | 8.040       | 0.187           | 0.716    | 2.835           |
|                                                          | TRAF6    | 0.177  | 10.908  | 8.246       | 0.129           | 0.566    | 2.872           |
|                                                          | NFKBIA   | 0.336  | 10.992  | 10.054      | 0.009           | 0.091    | 3.171           |
| Canonical NF- $\kappa$ B,<br>positive (n=20)             | TNFRSF1A | 0.737  | 11.025  | 44.182      | 0.000           | 2.15E-06 | 6.647           |
|                                                          | IL1R1    | -0.026 | 10.877  | 0.591       | 0.925           | 1.000    | -0.768          |
|                                                          | TLR4     | 0.381  | 10.964  | 14.274      | 0.007           | 0.070    | 3.778           |
|                                                          | RELA     | 0.131  | 10.926  | 2.937       | 0.372           | 1.000    | 1.714           |
|                                                          | REL      | 0.702  | 11.157  | 31.385      | 0.000           | 1.51E-06 | 5.602           |
|                                                          | NFKB1    | 0.304  | 10.926  | 14.740      | 0.023           | 0.170    | 3.839           |
|                                                          | CHUK     | -0.071 | 10.898  | 0.113       | 0.816           | 1.000    | -0.337          |
|                                                          | IKBKB    | 0.177  | 11.019  | 3.217       | 0.126           | 0.556    | 1.793           |
|                                                          | IKBKG    | -0.116 | 10.895  | 7.121       | 0.392           | 1.000    | -2.669          |
|                                                          | MAP3K7   | 0.186  | 10.960  | 5.109       | 0.111           | 0.514    | 2.260           |
|                                                          | TNF      | 0.000  | 10.876  | 0.000       | 1.000           | 1.000    | 0.000           |
|                                                          | IL12B    | 0.000  | 10.876  | 0.000       | 1.000           | 1.000    | 0.000           |
|                                                          | IL15RA   | 0.125  | 10.885  | 28.547      | 0.121           | 0.542    | 5.343           |
|                                                          | IL18     | 0.892  | 11.150  | 46.178      | 0.000           | 1.83E-09 | 6.795           |
|                                                          | IL1A     | -0.001 | 10.878  | 3.382       | 0.676           | 1.000    | -1.839          |
|                                                          | IL1B     | -0.178 | 10.892  | 27.403      | 0.043           | 0.266    | -5.235          |
|                                                          | IL23A    | 0.017  | 10.877  | 46.194      | 0.185           | 0.712    | 6.797           |
|                                                          | IL6      | -0.009 | 10.876  | 10.596      | 0.215           | 0.781    | -3.255          |
|                                                          | IL6ST    | 0.565  | 11.310  | 22.090      | 0.000           | 1.03E-04 | 4.700           |
|                                                          | IL7R     | -0.297 | 10.887  | 95.257      | 0.001           | 0.019    | -9.760          |
| Non-canonical NF- $\kappa$ B,<br>negative (11) (n=5)     | MACROD1  | -0.046 | 10.883  | 1.318       | 0.808           | 1.000    | -1.148          |
|                                                          | GSTA4    | -0.799 | 10.906  | 139.915     | 0.000           | 2.37E-05 | -11.829         |
|                                                          | SCN9A    | 0.128  | 10.882  | 52.211      | 0.029           | 0.202    | 7.226           |
|                                                          | BDNF     | -0.199 | 10.883  | 36.573      | 0.622           | 1.000    | -6.048          |
|                                                          | LACTB    | 0.024  | 10.931  | 0.268       | 0.687           | 1.000    | 0.518           |
| Non-canonical<br>NF- $\kappa$ B, positive (11)<br>(n=13) | PPARG    | 0.060  | 10.881  | 46.643      | 0.065           | 0.359    | 6.830           |
|                                                          | DDIT3    | -0.211 | 10.902  | 17.998      | 0.082           | 0.420    | -4.242          |
|                                                          | NUPR1    | 0.318  | 10.906  | 0.781       | 0.406           | 1.000    | 0.884           |
|                                                          | RAB3B    | -0.226 | 10.881  | 196.329     | 0.001           | 0.021    | -14.012         |
|                                                          | IGFBP4   | 0.516  | 10.924  | 35.241      | 0.007           | 0.074    | 5.936           |
|                                                          | LRRC8C   | 0.776  | 10.980  | 52.088      | 0.000           | 3.46E-06 | 7.217           |
|                                                          | TCP11L2  | 0.071  | 10.893  | 7.730       | 0.291           | 0.935    | 2.780           |
|                                                          | MAFK     | 0.285  | 10.903  | 27.120      | 0.011           | 0.104    | 5.208           |
|                                                          | NRG1     | -0.085 | 10.878  | 89.556      | 0.111           | 0.515    | -9.463          |
|                                                          | F2R      | 0.062  | 10.882  | 12.100      | 0.361           | 1.000    | 3.478           |
|                                                          | KRT19    | 1.395  | 11.112  | 238.154     | 0.000           | 7.45E-15 | 15.432          |



|                                         |           |        |        |         |       |          |         |
|-----------------------------------------|-----------|--------|--------|---------|-------|----------|---------|
|                                         | CTGF      | 0.050  | 10.883 | 0.123   | 0.875 | 1.000    | 0.350   |
|                                         | ZFC3H1    | 0.562  | 11.129 | 24.219  | 0.000 | 6.16E-05 | 4.921   |
| Non-canonical<br>NF-κB, negative (n=6)  | TRAF2     | 0.146  | 10.889 | 1.566   | 0.671 | 1.000    | 1.251   |
|                                         | TRAF3     | 0.111  | 10.910 | 3.733   | 0.337 | 1.000    | 1.932   |
|                                         | BIRC2     | 0.223  | 10.979 | 6.197   | 0.055 | 0.318    | 2.489   |
|                                         | BIRC3     | 0.081  | 10.888 | 2.421   | 0.543 | 1.000    | 1.556   |
|                                         | TRIM9     | -1.241 | 11.007 | 116.771 | 0.000 | 1.14E-10 | -10.806 |
|                                         | FBXW7     | -0.691 | 11.012 | 33.434  | 0.000 | 1.76E-05 | -5.782  |
| Non-canonical<br>NF-κB, positive (n=10) | LTBR      | 0.829  | 11.000 | 58.181  | 0.000 | 2.27E-07 | 7.628   |
|                                         | CD40      | -0.135 | 10.897 | 4.545   | 0.358 | 1.000    | -2.132  |
|                                         | TNFRSF8   | 0.044  | 10.878 | 22.773  | 0.357 | 1.000    | 4.772   |
|                                         | CD27      | 0.000  | 10.876 | 0.000   | 1.000 | 1.000    | 0.000   |
|                                         | TNFRSF13C | 0.073  | 10.934 | 0.800   | 0.558 | 1.000    | 0.895   |
|                                         | TNFRSF1B  | 0.785  | 11.081 | 41.537  | 0.000 | 6.20E-07 | 6.445   |
|                                         | TNFRSF11A | 0.173  | 10.902 | 12.747  | 0.093 | 0.457    | 3.570   |
|                                         | RELB      | 0.216  | 10.886 | 58.181  | 0.015 | 0.124    | 7.628   |
|                                         | NFKB2     | 0.098  | 10.894 | 6.464   | 0.286 | 0.924    | 2.542   |
|                                         | MAP3K14   | 0.236  | 10.906 | 15.740  | 0.047 | 0.282    | 3.967   |

Genes, expression of which is significantly different between A-T and Ctrl (FDR < 0.05), are highlighted in green. FC – fold change, CPM - counts per million, and FDR – false discovery rate.

## SUPPLEMENTARY REFERENCES

1. Janabi, N., Peudenier, S., Heron, B., Ng, K.H. and Tardieu, M. (1995) Establishment of human microglial cell lines after transfection of primary cultures of embryonic microglial cells with the SV40 large T antigen. *Neurosci Lett*, **195**, 105-108.
2. Garcia-Mesa, Y., Jay, T.R., Checkley, M.A., Luttge, B., Dobrowolski, C., Valadkhan, S., Landreth, G.E., Karn, J. and Alvarez-Carbonell, D. (2017) Immortalization of primary microglia: a new platform to study HIV regulation in the central nervous system. *Journal of NeuroVirology*, **23**, 47-66.
3. Ran, F.A., Hsu, P.D., Wright, J., Agarwala, V., Scott, D.A. and Zhang, F. (2013) Genome engineering using the CRISPR-Cas9 system. *Nature Protocols*, **8**, 2281-2308.
4. Chiang, T.W.W., Le Sage, C., Larrieu, D., Demir, M. and Jackson, S.P. (2016) CRISPR-Cas9D10A nickase-based genotypic and phenotypic screening to enhance genome editing. *Scientific Reports*, **6**, 1-17.
5. Canman, C.E., Lim, D.S., Cimprich, K.A., Taya, Y., Tamai, K., Sakaguchi, K., Appella, E., Kastan, M.B. and Siliciano, J.D. (1998) Activation of the ATM kinase by ionizing radiation and phosphorylation of p53. *Science*, **281**, 1677-1679.
6. Andersson-Rolf, A., Mustata, R.C., Merenda, A., Kim, J., Perera, S., Grego, T., Andrews, K., Tremble, K., Silva, J.C., Fink, J. *et al.* (2017) One-step generation of conditional and reversible gene knockouts. *Nat Methods*, **14**, 287-289.
7. Berkovich, E., Monnat, R.J., Jr. and Kastan, M.B. (2007) Roles of ATM and NBS1 in chromatin structure modulation and DNA double-strand break repair. *Nat Cell Biol*, **9**, 683-690.
8. Newman, A.C., Kemp, A.J., Drabsch, Y., Behrends, C. and Wilkinson, S. (2017) Autophagy acts through TRAF3 and RELB to regulate gene expression via antagonism of SMAD proteins. *Nat Commun*, **8**, 1537.
9. van Uden, P., Kenneth, N.S., Webster, R., Muller, H.A., Mudie, S. and Rocha, S. (2011) Evolutionary conserved regulation of HIF-1beta by NF-kappaB. *PLoS Genet*, **7**, e1001285.
10. Woodhouse, B.C., Dianova, II, Parsons, J.L. and Dianov, G.L. (2008) Poly(ADP-ribose) polymerase-1 modulates DNA repair capacity and prevents formation of DNA double strand breaks. *DNA Repair (Amst)*, **7**, 932-940.
11. Bakhoun, S.F., Ngo, B., Laughney, A.M., Cavallo, J.A., Murphy, C.J., Ly, P., Shah, P., Sriram, R.K., Watkins, T.B.K., Taunk, N.K. *et al.* (2018) Chromosomal instability drives metastasis through a cytosolic DNA response. *Nature*, **553**, 467-472.
